# Supplementary material for: The impact of aggregation on the p-doping kinetics of poly(3-hexylthiophene)
Source: Royal Society of Chemistry journal article supplement (doi:10.1039/c7tc00189d), 2017-01-01
Supplement: c7tc00189d1.pdf [file c7tc00189d1.pdf]

## Electronic Supplementary Information

# The Impact of Aggregation on the p-Doping Kinetics of Poly(3-hexylthiophene)

Frederick M. McFarland<sup>a</sup>, Lindsey Bonnette<sup>a</sup>, Elisha A. Acres<sup>b</sup>, Song Guo<sup>a\*</sup>

*a. Department of Chemistry and Biochemistry, University of Southern Mississippi, Hattiesburg, MS 39406*

*b. Oak Grove High School, Hattiesburg, MS 39402*

\*song.guo@usm.edu

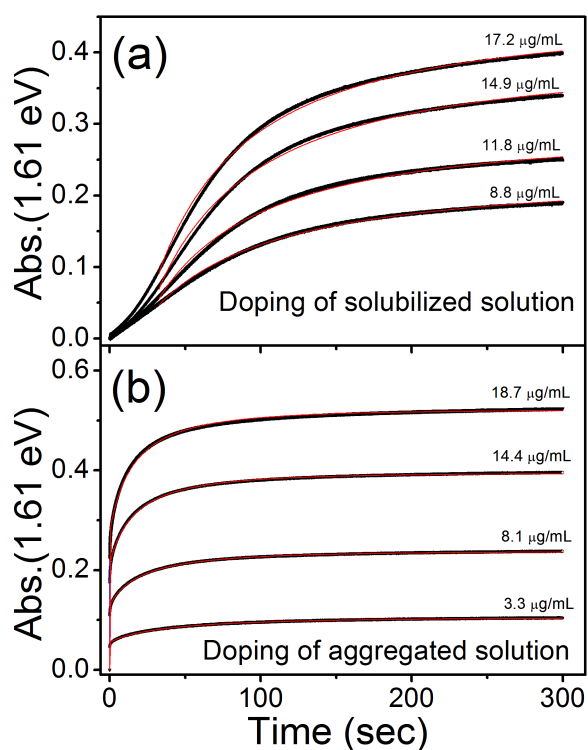

Figure S1: The 1.61 eV absorbance of p-doping products versus time for various (a) P3HT solubilized and (b) P3HT aggregated solutions mixed with excess amount of F<sub>4</sub>-TCNQ. The initial concentrations of P3HT are marked in the image, and the initial concentration of F<sub>4</sub>-TCNQ is 125 μg/mL. The red lines in (a) and (b) are Gaussian exponential fit curves as discussed in the main text.

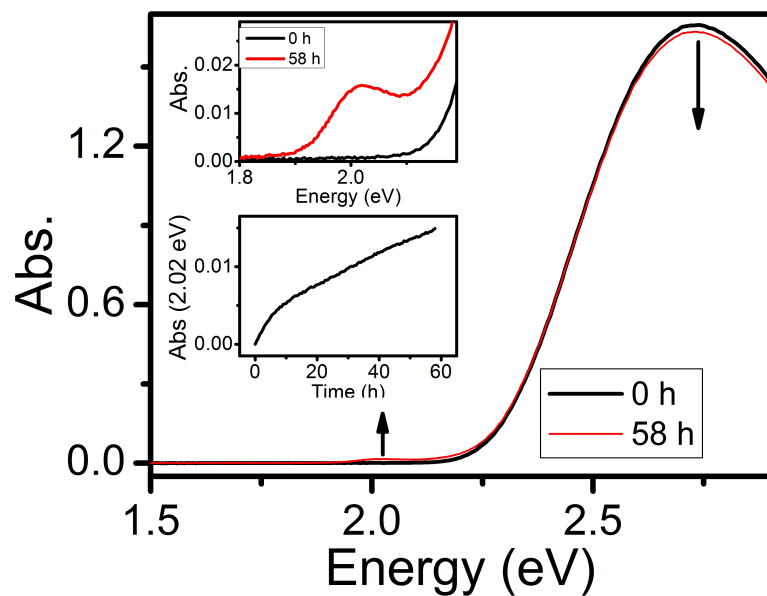

Figure S2: UV-Vis absorption spectra of a 30 µg/mL P3HT solubilized solution in toluene and its spectra after aging at room temperature for 58 h. The top inset displays the amplified spectra between 1.8 and 2.2 eV to show the aggregation peak at 2.02 eV. The bottom inset is the plot of the 2.02 eV absorbance versus time.
